# Supplementary material for: Disease associations with monoclonal gammopathy of undetermined significance can only be evaluated using screened cohorts: results from the population-based iStopMM study
Source: PubMed Central journal article supplement — Haematologica. 2023 Jul 13;108(12):3392–8. doi: 10.3324/haematol.2023.283191 (PMC10690899; doi:10.3324/haematol.2023.283191), 2023-07-13
Supplement: 2023_283191_SIGURBERSDOTTIR_SUPPL.pdf [file 2023_283191_SIGURBERSDOTTIR_SUPPL.pdf]

# Disease associations with monoclonal gammopathy of undetermined significance can only be evaluated using screened cohorts: results from the population-based iStopMM study

Aðalbjörg Ýr Sigurbergisdóttir,<sup>1</sup> Sæmundur Rögnvaldsson,<sup>1,2</sup> Sigrún Thorsteinsdóttir,<sup>1,3</sup> Ingigerður Sverrisdóttir,<sup>1,4</sup> Guðrún Ásta Sigurðardóttir,<sup>1</sup> Brynjar Viðarsson,<sup>2</sup> Páll Torfi Önundarson,<sup>1,2</sup> Bjarni A. Agnarsson,<sup>2</sup> Margrét Sigurðardóttir,<sup>2</sup> Ingunn Þorsteinsdóttir,<sup>2</sup> Ísleifur Ólafsson,<sup>2</sup> Ásdís Rósa Þórðardóttir,<sup>1</sup> Gauti Kjartan Gíslason,<sup>1</sup> Andri Ólafsson,<sup>1</sup> Malin Hultcrantz,<sup>5</sup> Brian G. M. Durie,<sup>6</sup> Stephen Harding,<sup>7</sup> Ola Landgren,<sup>8</sup> Thorvarður Jón Löve<sup>1,2</sup> and Sigurður Yngvi Kristinsson<sup>1,2</sup>

<sup>1</sup>University of Iceland, Reykjavík, Iceland; <sup>2</sup>Landspítali - the National University Hospital of Iceland, Reykjavík, Iceland; <sup>3</sup>Rigshospitalet, Copenhagen, Denmark; <sup>4</sup>Sahlgrenska University Hospital, Gothenburg, Sweden; <sup>5</sup>Memorial Sloan Kettering Cancer Center, New York, NY, USA; <sup>6</sup>Cedars-Sinai Samuel Oschin Cancer Center, Los Angeles, CA, USA; <sup>7</sup>The Binding Site, Birmingham, UK and <sup>8</sup>Sylvester Comprehensive Cancer Center, Miami, FL, USA

**Correspondence:** S.Y. Kristinsson  
[sigyngvi@hi.is](mailto:sigyngvi@hi.is)

**Received:** March 22, 2023.

**Accepted:** June 30, 2023.

**Early view:** July 13, 2023.

<https://doi.org/10.3324/haematol.2023.283191>

©2023 Ferrata Storti Foundation

Published under a CC BY-NC license

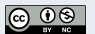

**Supplementary table 1: Comorbidity categories, underlying medical disorders and diagnostic codes**

| Comorbidity                        | Included medical disorders                                                                                                                                                                                                                                                                                                                                                                                                               | ICD-10 codes                                                                                                          |
|------------------------------------|------------------------------------------------------------------------------------------------------------------------------------------------------------------------------------------------------------------------------------------------------------------------------------------------------------------------------------------------------------------------------------------------------------------------------------------|-----------------------------------------------------------------------------------------------------------------------|
| <b>Arrhythmia</b>                  | Atrioventricular and left bundle-branch block, paroxysmal tachycardia, atrial fibrillation and flutter, sick sinus syndrome, other cardiac arrhythmias                                                                                                                                                                                                                                                                                   | I44, I47-I48, I49.5, I49.8, I49.9                                                                                     |
| <b>Cancer</b>                      | All malignant neoplasms, other than multiple myeloma                                                                                                                                                                                                                                                                                                                                                                                     | C00-C88, C91-C97                                                                                                      |
| <b>Cerebrovascular disease</b>     | Cerebral infarction, cerebral arterial diseases, transient ischemic attacks                                                                                                                                                                                                                                                                                                                                                              | I63-I66, I69.3, I69.4, G45                                                                                            |
| <b>Chronic ischemic disease</b>    | Acute myocardial infarction, chronic ischemic heart disease, myocardial infarction following acute coronary disease                                                                                                                                                                                                                                                                                                                      | I21-I23, I24.8, I24.9, I25, Z95.5                                                                                     |
| <b>Chronic kidney disease</b>      | Hypertensive chronic kidney disease, hypertensive heart and chronic kidney disease, glomerular diseases, chronic kidney disease, unspecified kidney failure, complications of kidney transplant                                                                                                                                                                                                                                          | I12-I13, N0, N18-N19, T86.1, Z49.1, Z49.2, Z94.0                                                                      |
| <b>Chronic lung disease</b>        | Chronic bronchitis, emphysema, other chronic obstructive pulmonary disease, asthma, bronchiectasis, pneumoconiosis, interstitial lung diseases, respiratory failure                                                                                                                                                                                                                                                                      | J41-J47, J60-J67, J68.4, J70.1, J70.3, J84.1, J84.8, J84.9, J92.0, J96.1, J98.2                                       |
| <b>Dementia</b>                    | Dementia in Alzheimer's disease, vascular dementia, dementia in other diseases, unspecified dementia, delirium superimposed on dementia                                                                                                                                                                                                                                                                                                  | F00-F03, F05.1, G30                                                                                                   |
| <b>Diabetes</b>                    | Type 1 diabetes mellitus, type 2 diabetes mellitus, malnutrition-related diabetes mellitus, other specified diabetes mellitus, specified mellitus                                                                                                                                                                                                                                                                                        | E10-E14                                                                                                               |
| <b>Endocrine disease</b>           | Thyroid diseases, parathyroid diseases, hyper- and hypofunction of pituitary gland, Cushing's syndrome, adrenogenital disorders, hyperaldosteronism, other adrenal gland disorders, polyglandular dysfunction, diseases of thymus, other diseases of endocrine system                                                                                                                                                                    | E03-E05, E06.2-E06.5, E06.9, E07, E20-E27, E31, E32.0, E32.8, E32.9, E34-E45                                          |
| <b>Heart failure</b>               | Hypertensive heart disease, hypertensive heart and chronic kidney disease, cardiomyopathy, heart failure                                                                                                                                                                                                                                                                                                                                 | I11.0, I13.0, I13.2, I42, I50                                                                                         |
| <b>Hypertension</b>                | Essential hypertension, hypertensive heart disease, hypertensive chronic kidney disease, hypertensive heart and chronic kidney disease                                                                                                                                                                                                                                                                                                   | I10-I13                                                                                                               |
| <b>Inflammatory bowel disease</b>  | Crohn's disease, ulcerative colitis                                                                                                                                                                                                                                                                                                                                                                                                      | K50-K51, M07.4, M07.5, M09.1, M09.2                                                                                   |
| <b>Liver disease</b>               | Chronic viral hepatitis, unspecified viral hepatitis, esophageal varices, alcoholic liver disease, toxic liver disease, hepatic failure, chronic hepatitis, cirrhosis, inflammatory liver diseases, other liver diseases                                                                                                                                                                                                                 | B18-B19, I85, I98.3, K70-K74, K75.2-K75.4, K75.8, K75.9, K76, K77                                                     |
| <b>Neurological disease</b>        | Tropical spastic paraplegia, Huntington's disease, hereditary ataxia, spinal muscular atrophy and related disorders, systemic atrophies affecting central nervous system, postpolio syndrome, extrapyramidal disorders, other degenerative diseases of nervous system, multiple sclerosis, demyelinating diseases, epilepsy, polyneuropathies, disorders of myoneural junction and muscles, cerebral palsy and other paralytic syndromes | G04.1, G10-G12, G13.1, G13.2, G13.8, G14, G20-G23, G26, G32, G35-G37, G40-G41, G60-G62, G63.1-G63.6, G70-G72, G80-G83 |
| <b>Obesity</b>                     | Localized adiposity, overweight and obesity                                                                                                                                                                                                                                                                                                                                                                                              | E65-E66                                                                                                               |
| <b>Pancreatic disease</b>          | Diseases of pancreas                                                                                                                                                                                                                                                                                                                                                                                                                     | K86                                                                                                                   |
| <b>Peripheral vascular disease</b> | Atherosclerosis, peripheral vascular disease, stricture of artery, peripheral angiopathy, vascular diseases of intestines                                                                                                                                                                                                                                                                                                                | I70, I73.8, I73.9, I77.1, I79.2, K55.0, K55.1                                                                         |
| <b>Psychological disease</b>       | Dementia, anxiety disorders, dissociated and conversion disorders, somatoform disorders, somatoform disorders, eating disorders, personality disorders, unspecified mental disorder                                                                                                                                                                                                                                                      | F01-F03, F40-F45, F50, F60-F62, F69, F99                                                                              |
| <b>Rheumatological disease</b>     | Llupus erythomatosus, scleroderma, reactive arthritis, rheumatoid arthritis, psoriatic arthritis, juvenile arthritis, systemic connective tissue disorders, ankylosing spondylitis, other inflammatory spondylopathies                                                                                                                                                                                                                   | I73.1, L93, L94.0-L94.3, M02.3, M05-M06, M07.0-M07.3, M08, M09.0, M30-M35, M45, M46.0, M46.1, M46.8, M46.9            |

Overview of the comorbidity categories compared between individuals diagnosed with MGUS in the clinical setting and those diagnosed through systematic screening, included medical disorders and their diagnostic codes.

Abbreviations: ICD-10, International Classifications of Diseases, Tenth Revision
